# Supplementary material for: Real-time reverse transcription polymerase chain reaction development for rapid detection of Tomato brown rugose fruit virus and comparison with other techniques
Source: PeerJ. 2019 Oct 17;7:e7928. doi: 10.7717/peerj.7928 (PMC6800982; doi:10.7717/peerj.7928)
Supplement: Supplemental Information 2 — Standard curves prepared with 10-fold serial dilutions of in vitro-synthesized RNA transcripts from ToBRFV isolate ToB-SIC01/19 using RT-qPCR with TaqMan MGB probe. [file peerj-07-7928-s002.xlsx]

## Sheet: Foglio1
Standard curve
first experiment
	1 rep	2 rep	Concentration	Copies	Log conc.	Av. Ct
1	4.9	5	0.13	1x10E9	-0.886057	4.95
1*10-1	7.9	8.1	0.013	1x10E8	-1.88606	8
1*10-2	11.2	11.3	0.0013	1x10E7	-2.88606	11.25
1*10-3	14.7	14.7	0.00013	1x10E6	-3.88606	14.7
1*10-4	18.3	18.2	1.3e-05	1x10E5	-4.88606	18.25
1*10-5	21.3	21.4	1.3e-06	10000	-5.88606	21.35
1*10-6	24.2	24.5	1.3e-07	1000	-6.88606	24.35
1*10-7	27.6	27.9	1.3e-08	100	-7.88606	27.75
1*10-8	31.1	31.2	1.3e-09	10	-8.88606	31.15
Second experiment
	1 rep	2 rep	Concentration	Copies	Log conc.	Av. Ct
1	5.1	5	0.13	1x10E9	-0.886057	5.05
1*10-1	8	8.1	0.013	1x10E8	-1.88606	8.05
1*10-2	11.2	11.3	0.0013	1x10E7	-2.88606	11.25
1*10-3	14.7	14.6	0.00013	1x10E6	-3.88606	14.65
1*10-4	18.3	18.3	1.3e-05	1x10E5	-4.88606	18.3
1*10-5	21.3	21.4	1.3e-06	10000	-5.88606	21.35
1*10-6	24.2	24.1	1.3e-07	1000	-6.88606	24.15
1*10-7	27.6	27.7	1.3e-08	100	-7.88606	27.65
1*10-8	31.1	31	1.3e-09	10	-8.88606	31.05
third experiment
	1 rep	2 rep	Concentration	Copies	Log conc.	Av. Ct
1	4.9	4.9	0.13	1x10E9	-0.886057	4.9
1*10-1	7.9	8	0.013	1x10E8	-1.88606	7.95
1*10-2	11.1	11.3	0.0013	1x10E7	-2.88606	11.2
1*10-3	14.7	14.6	0.00013	1x10E6	-3.88606	14.65
1*10-4	18.2	18.1	1.3e-05	1x10E5	-4.88606	18.15
1*10-5	21.3	21.5	1.3e-06	10000	-5.88606	21.4
1*10-6	24.2	24.3	1.3e-07	1000	-6.88606	24.25
1*10-7	27.5	27.6	1.3e-08	100	-7.88606	27.55
1*10-8	31.1	31	1.3e-09	10	-8.88606	31.05
fourth experiment
	1 rep	2 rep	Concentration	Copies	Log conc.	Av. Ct
1	5	5	0.13	1x10E9	-0.886057	5
1*10-1	7.9	8	0.013	1x10E8	-1.88606	7.95
1*10-2	11	11.1	0.0013	1x10E7	-2.88606	11.05
1*10-3	14.7	14.7	0.00013	1x10E6	-3.88606	14.7
1*10-4	18.2	18.3	1.3e-05	1x10E5	-4.88606	18.25
1*10-5	21.3	21.4	1.3e-06	10000	-5.88606	21.35
1*10-6	24.2	24.2	1.3e-07	1000	-6.88606	24.2
1*10-7	27.6	27.6	1.3e-08	100	-7.88606	27.6
1*10-8	31	31.1	1.3e-09	10	-8.88606	31.05
